# Supplementary material for: Enrichment of mutant calmodulin protein in a murine model of a human calmodulinopathy
Source: JCI journal article supplement (doi:10.1172/jci.insight.185524), 2025-07-24

# **Cardiac Enrichment of Mutant Calmodulin Protein in a Murine Model of a Human Calmodulinopathy**

- Full gel images for cropped panels in Western blot and Restriction Fragment Length Polymorphism
- Figure 2A, Figure 4A&C, and Supplemental Figure S1

**Figure 2A**

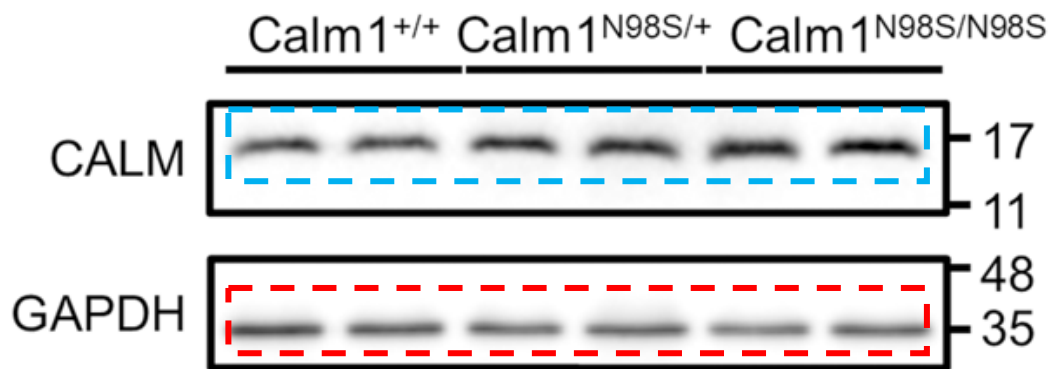

# CaM/marker

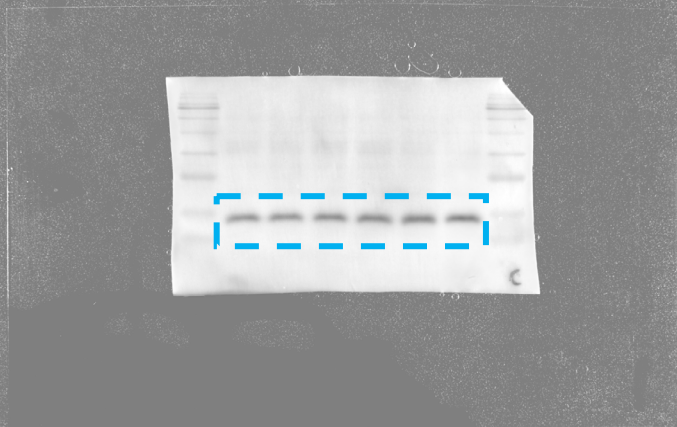

**GAPDH/marker**

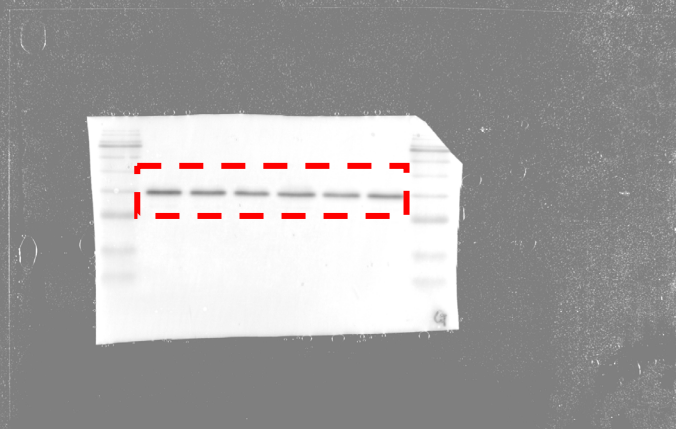

**Figure 4A (Non-transfection and HA Calm-HA)**

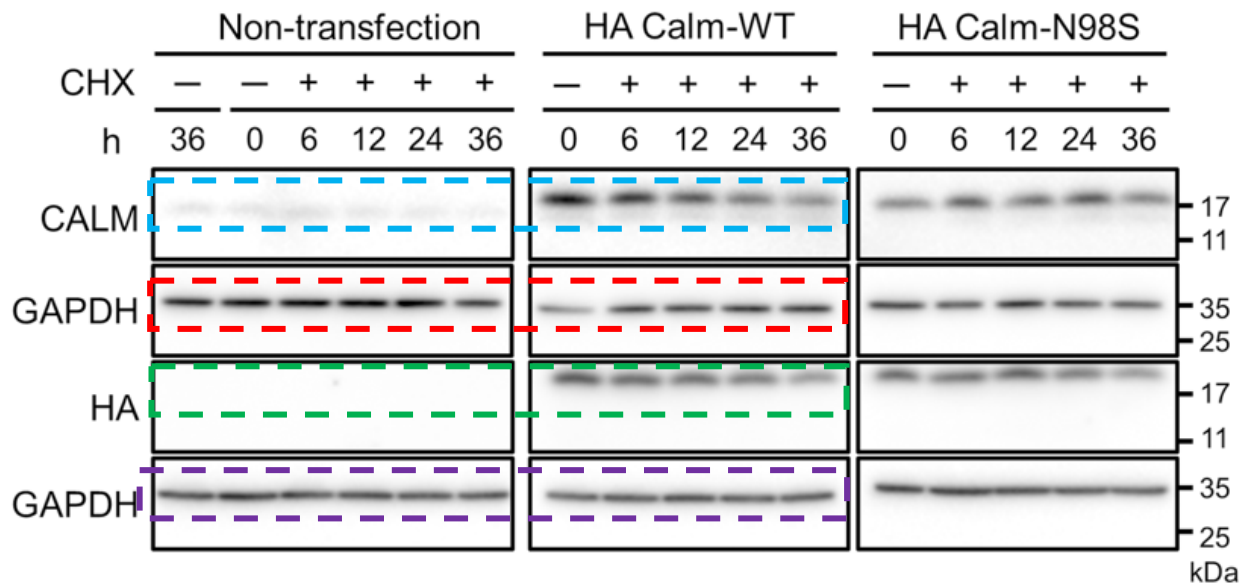

CaM/marker

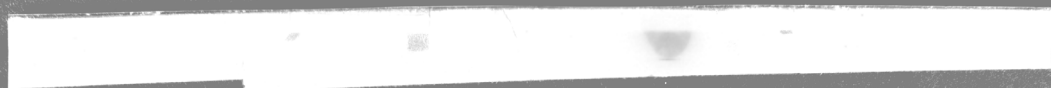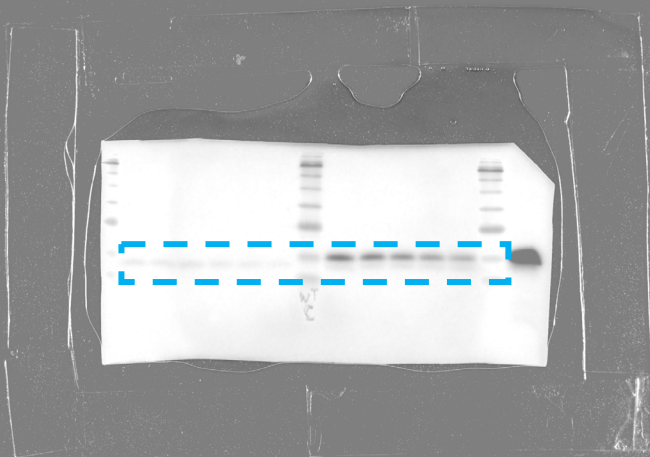

# CaM-GAPDH/marker

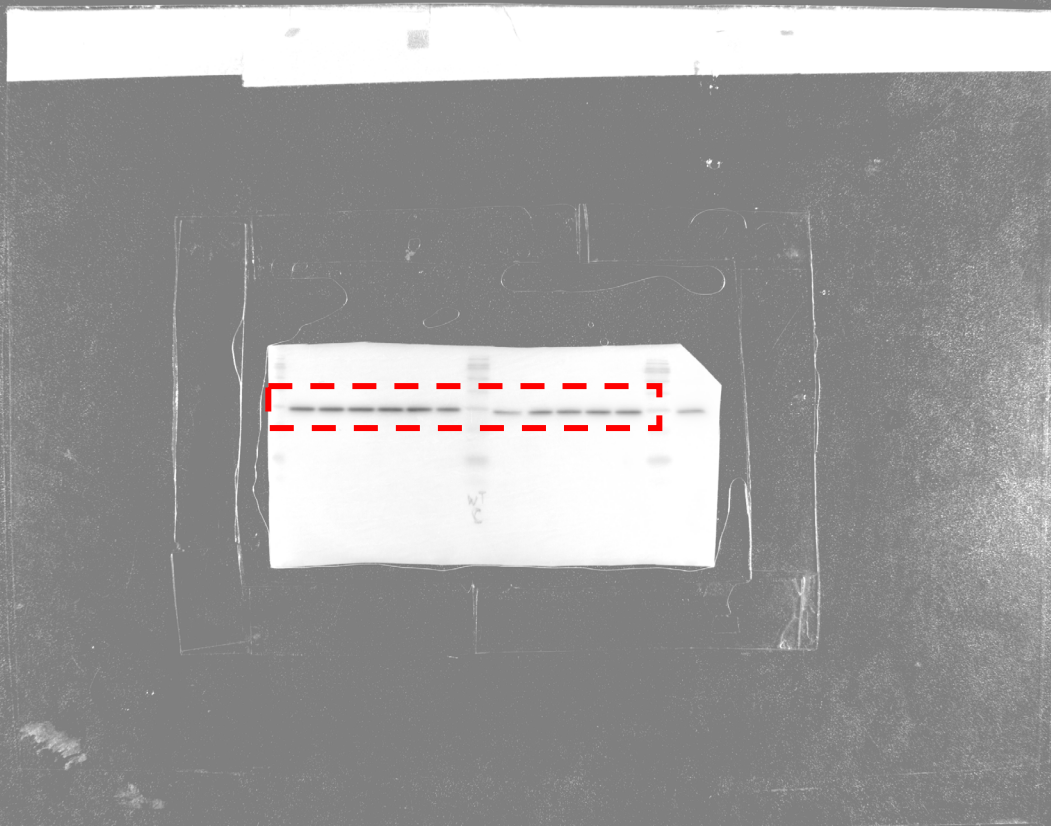

HA/marker

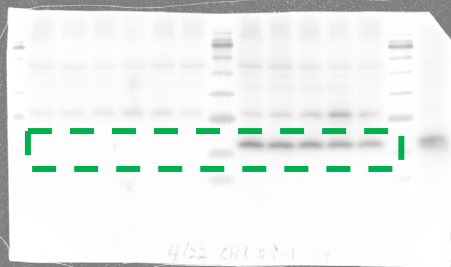

HA-GAPDH/marker

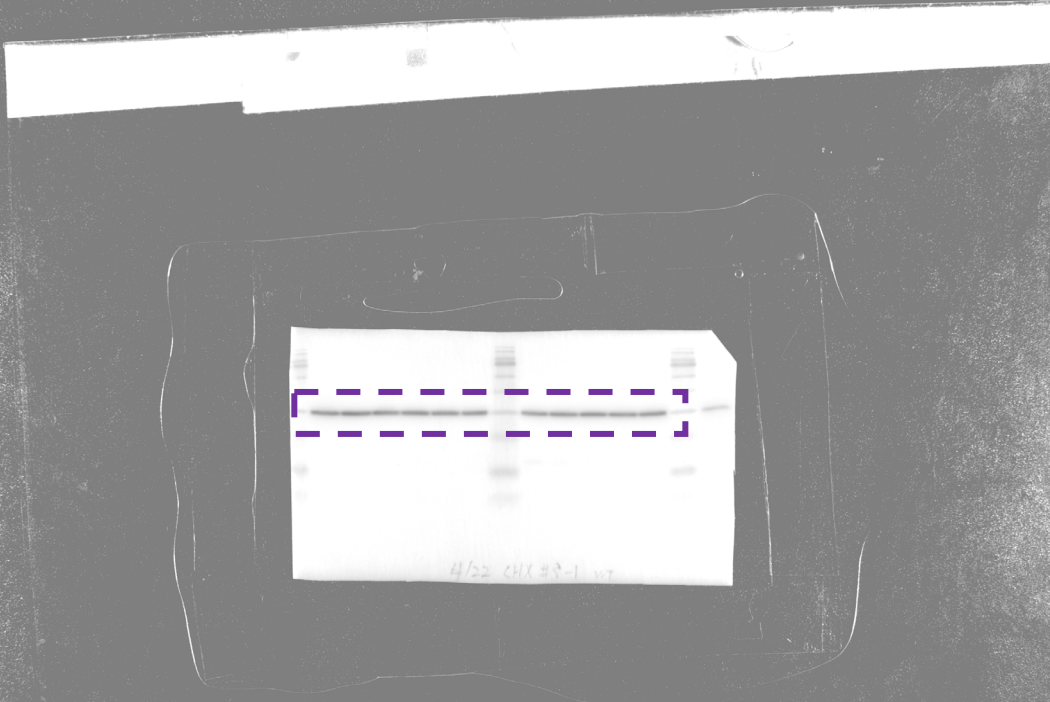

# Figure 4A (HA Calm-N98S)

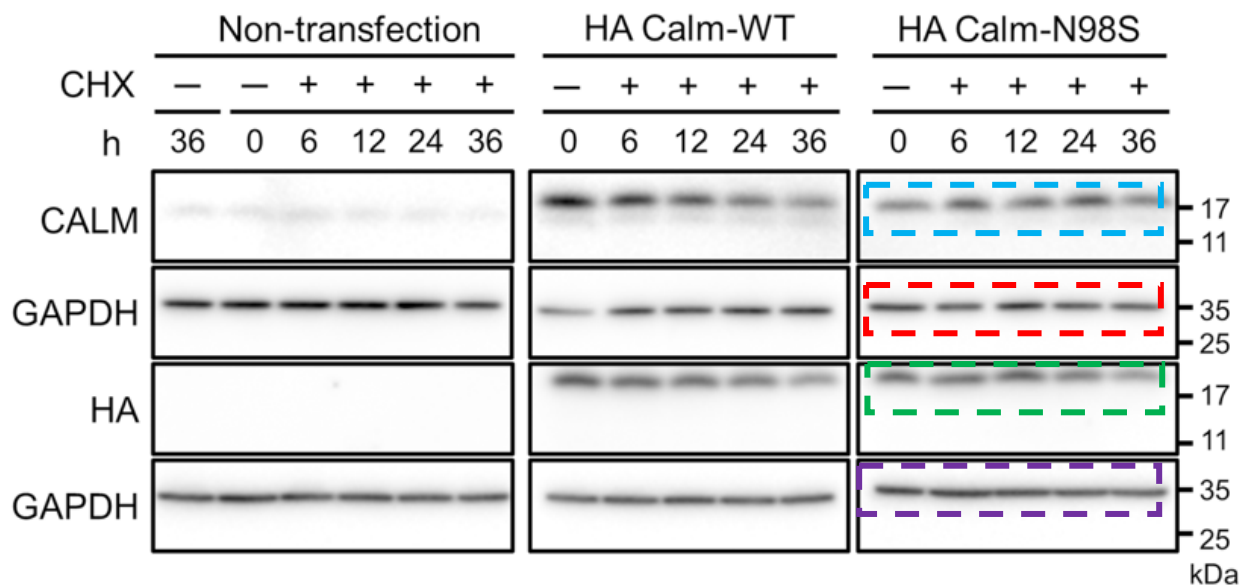

CaM/marker

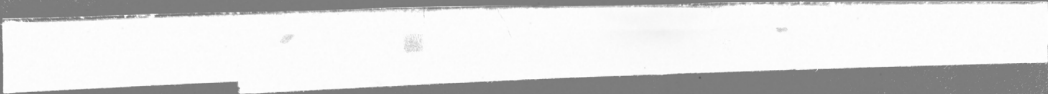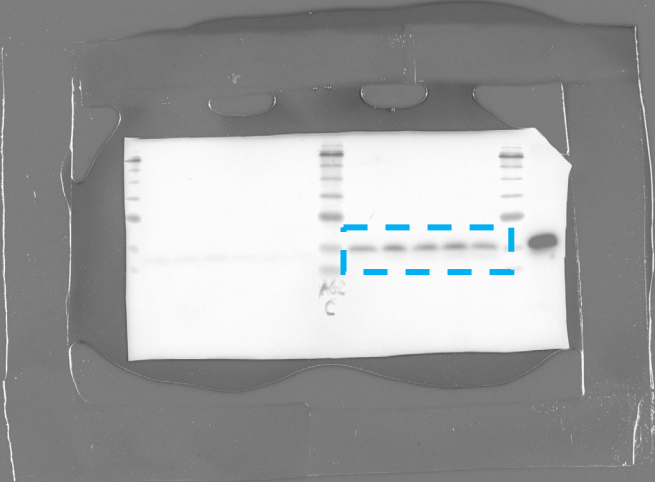

CaM-GAPDH/marker

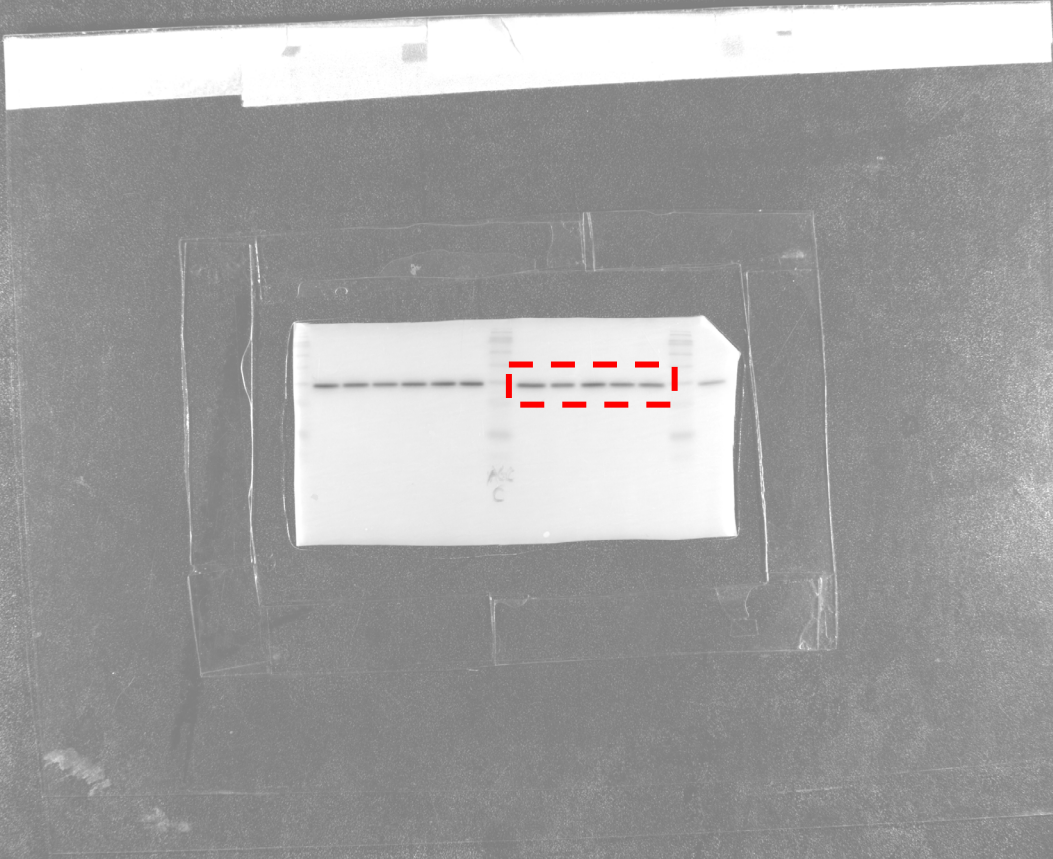

HA/marker

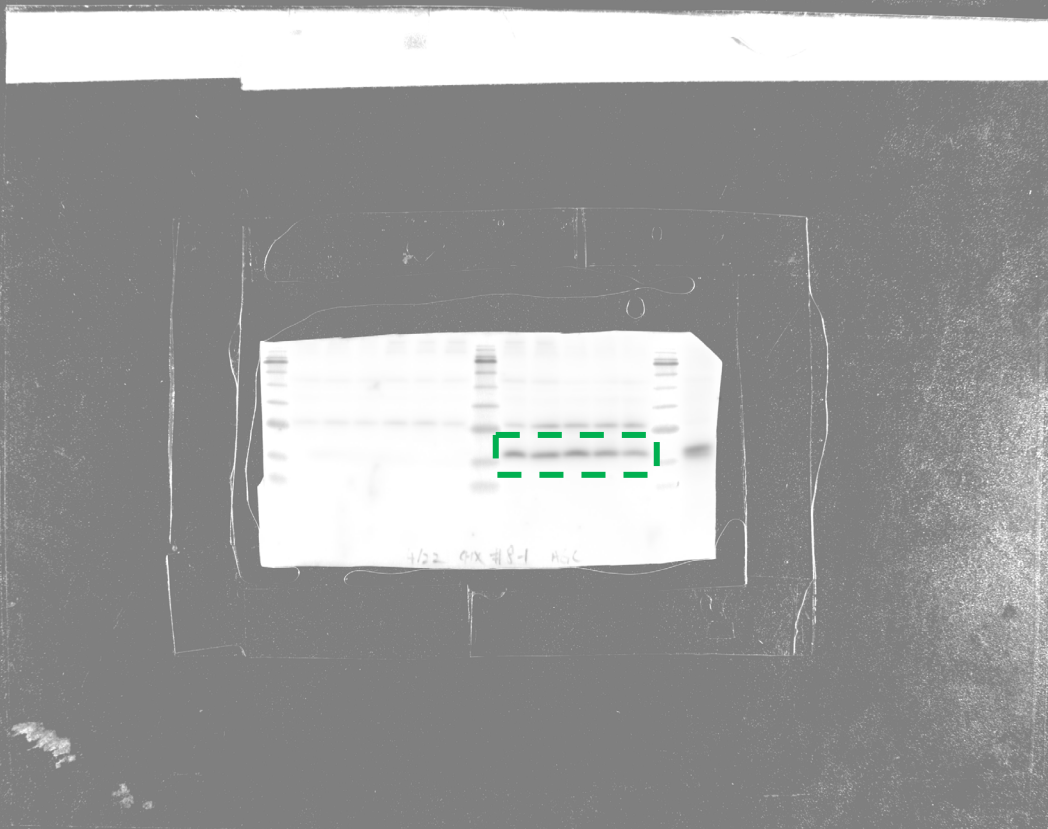

**HA-GAPDH/marker**

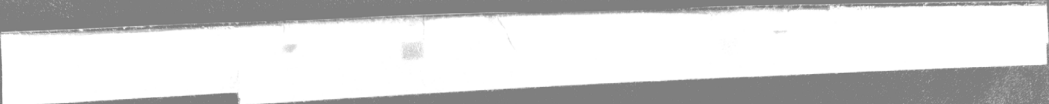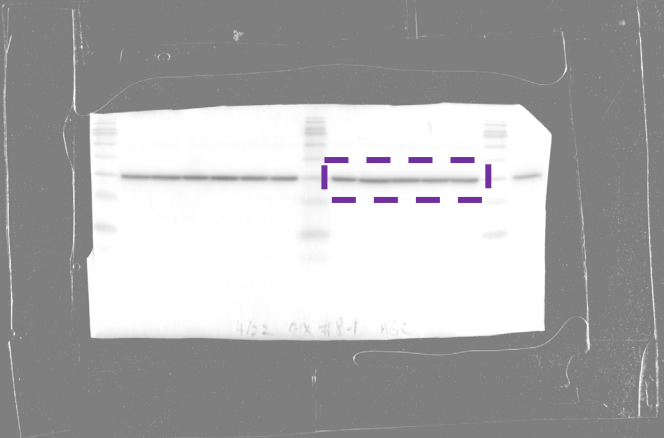

# Figure 4C

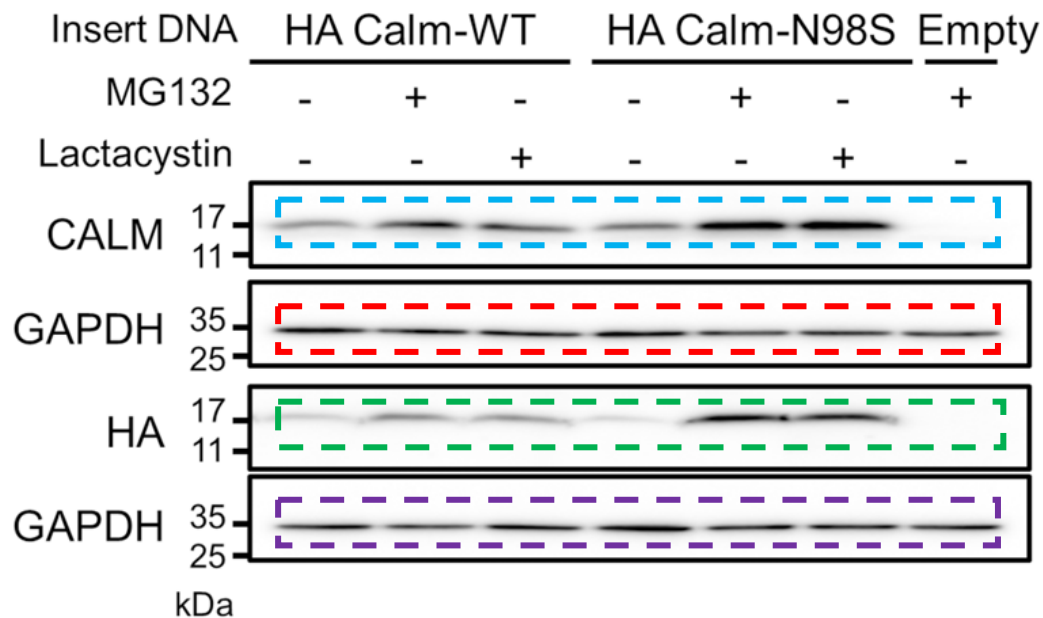

CaM/marker

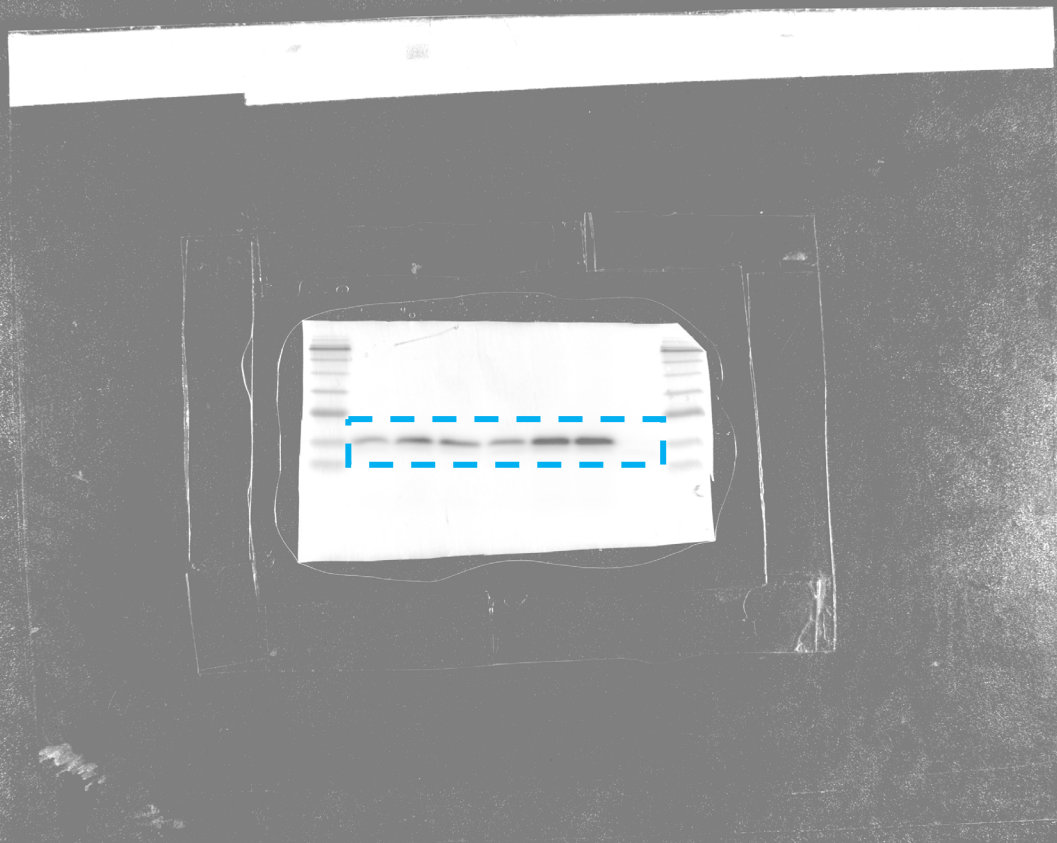

CaM-GAPDH/marker

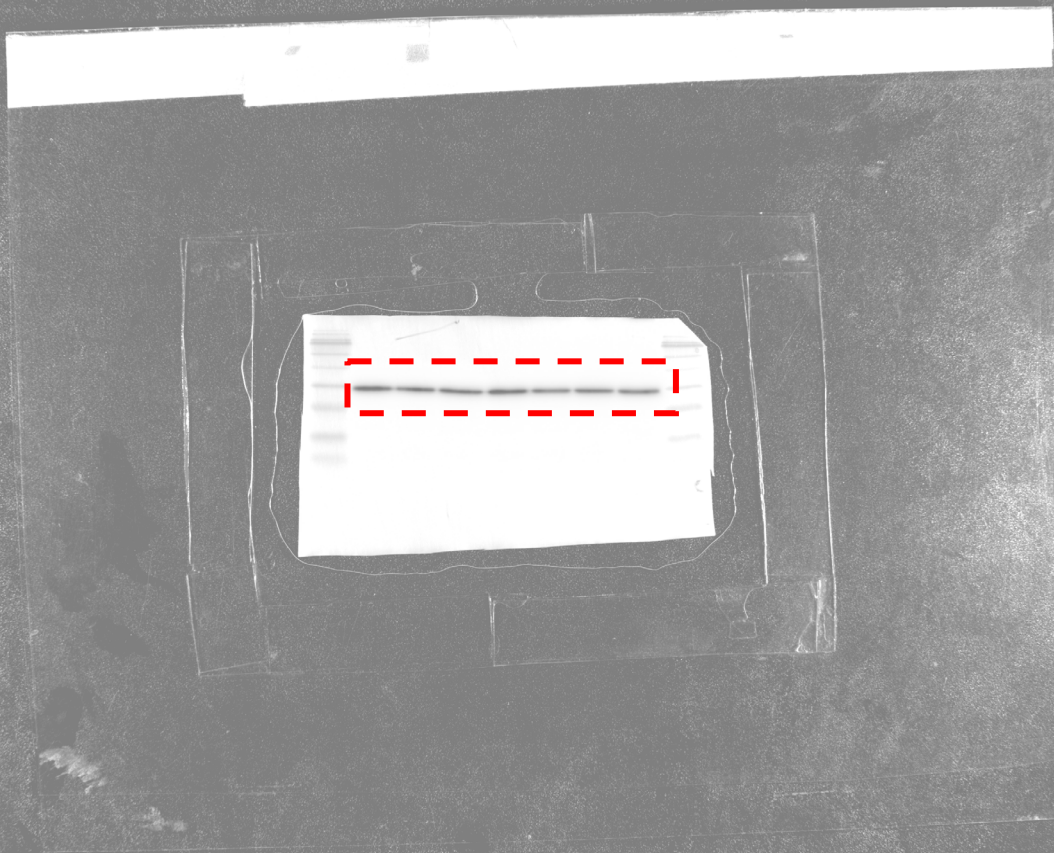

HA/marker

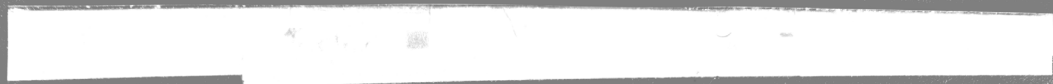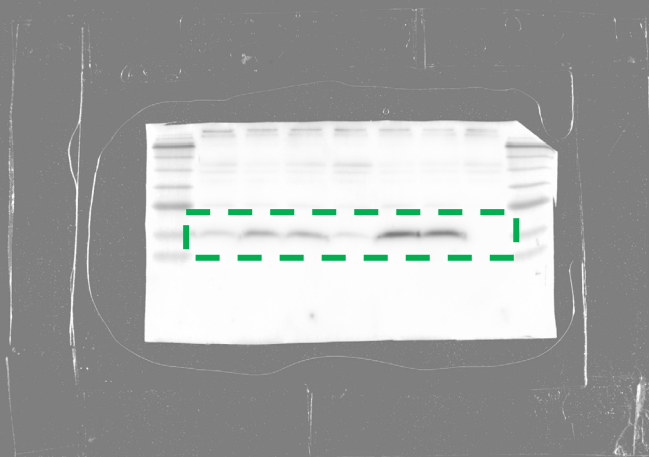

**HA-GAPDH/marker**

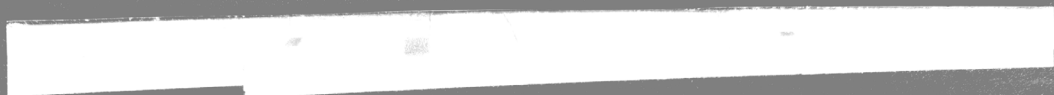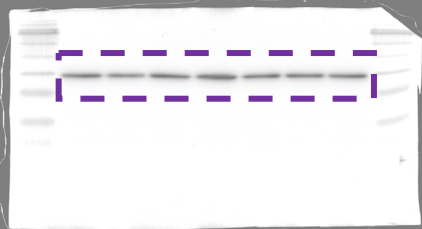

# Supplemental Figure S1

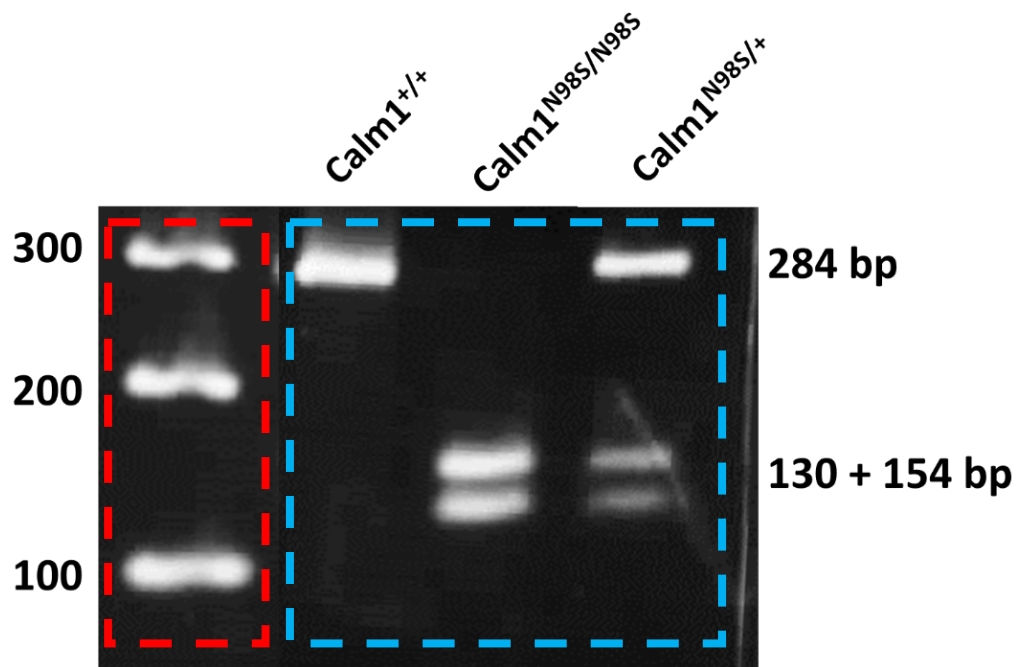

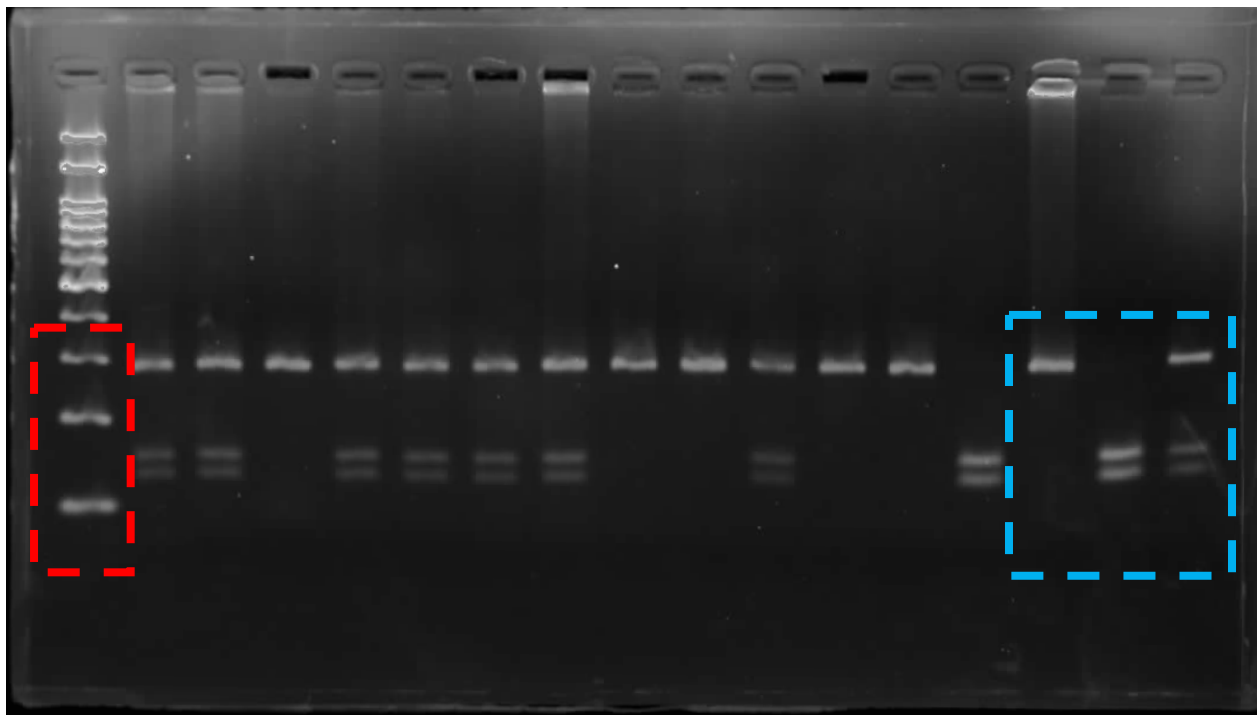

Supplement: sd2 [file 2]
